# Supplementary material for: Syntheses and magnetic properties of three Mn(ii) coordination polymers based on a tripodal flexible ligand
Source: Royal Society of Chemistry journal article supplement (doi:10.1039/c1ce06213a), 2011-12-14
Supplement: c1ce06213a.pdf [file c1ce06213a.pdf]

## Supporting information

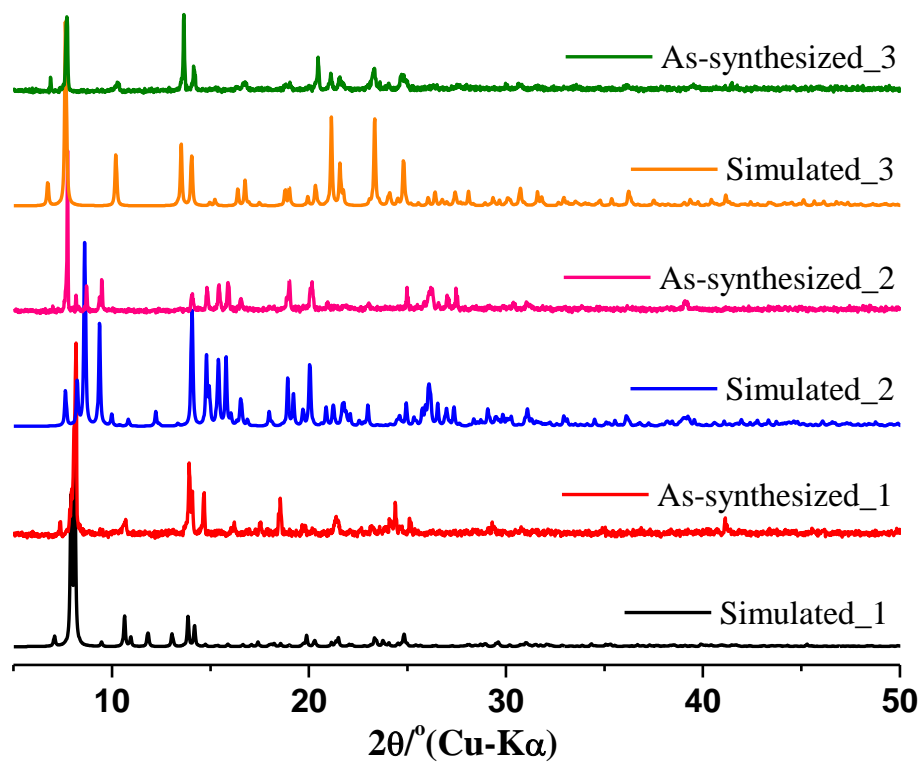

Fig. S1 Simulated (i) and experimental (ii) X-ray powder diffraction patterns for **1**, **2** and **3**.

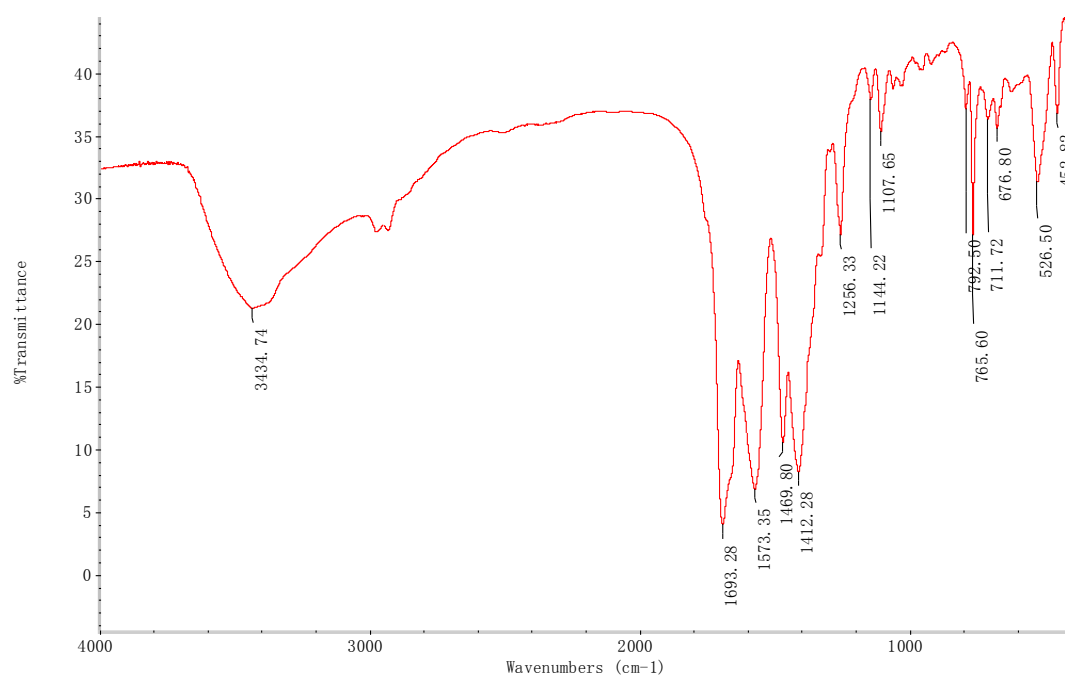

Fig. S4 IR spectrum of **1**

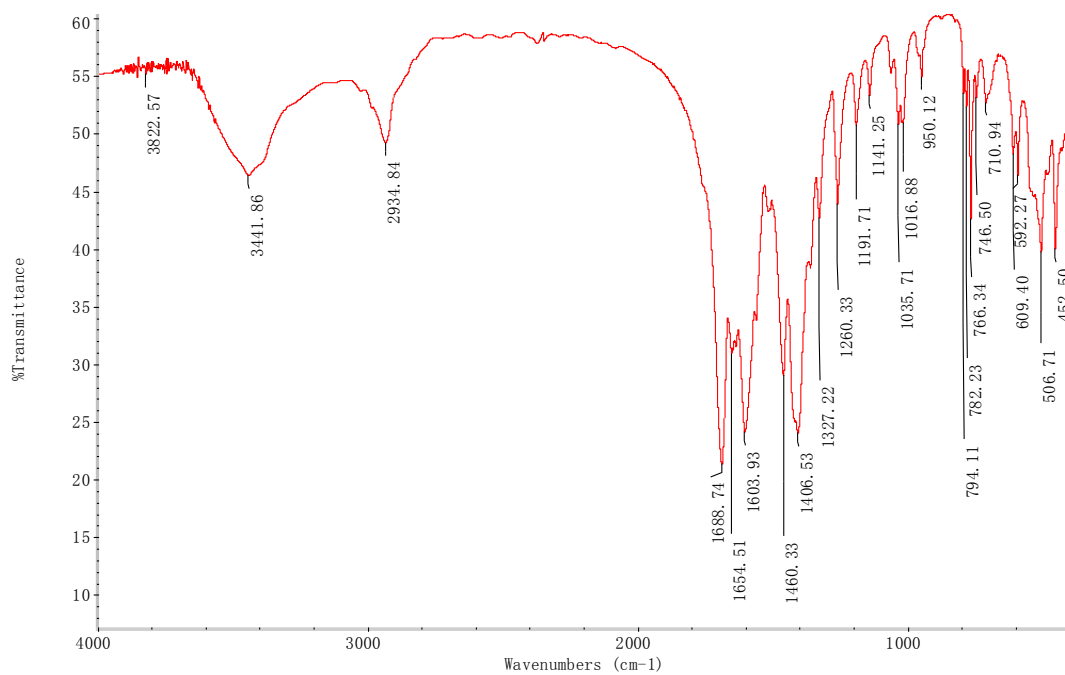

Fig. S5 IR spectrum of **2**

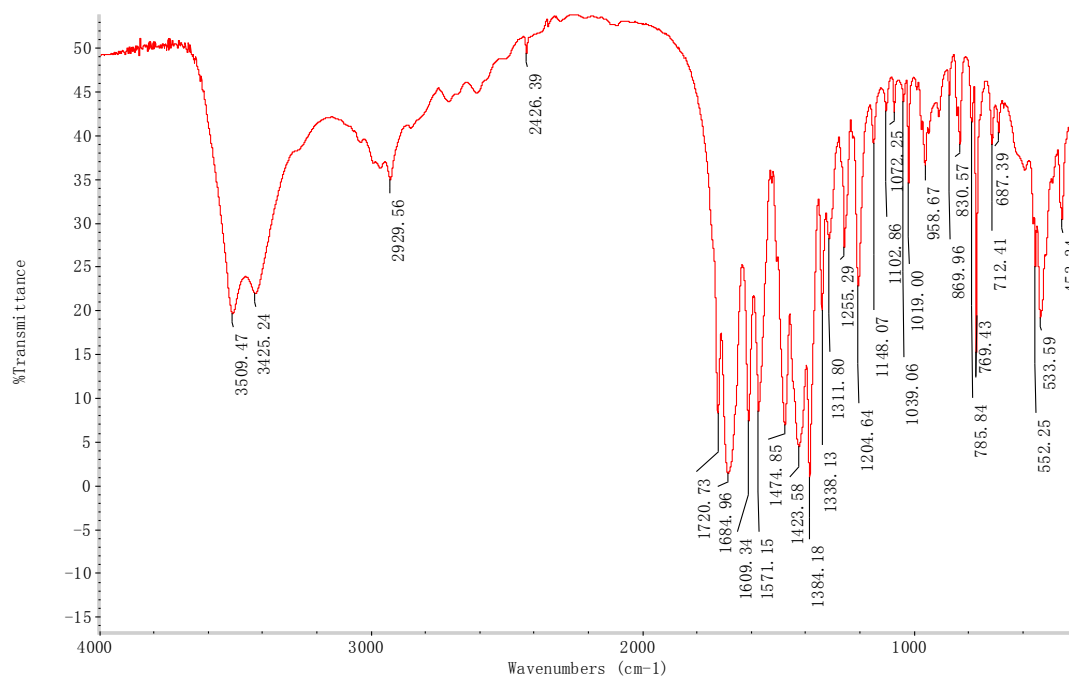

Fig. S6 IR spectrum of **3**.
